# Supplementary material for: The sonochemical functionalization of MoS2 by zinc phthalocyanine and its visible light-induced photocatalytic activity
Source: Royal Society of Chemistry journal article supplement (doi:10.1039/c8nj05976d), 2019-01-01
Supplement: c8nj05976d1.pdf [file c8nj05976d1.pdf]

*Supplementary Material (SM) for*

**Sonochemical functionalization of MoS<sub>2</sub> by Zinc Phthalocyanine  
and its visible light induced photocatalytic activity**

Sk Ibrahim<sup>a</sup>, Tanusri Pal<sup>b</sup>, Surajit Ghosh<sup>a,\*</sup>

<sup>†</sup>Department of Physics & Technophysics, Vidyasagar University, Midnapore 721102, WB, India.

<sup>‡</sup> Department of Physics, Midnapore College, Midnapore 721101, WB, India.

\*Corresponding authors E-mail: surajit@mail.vidyasagar.ac.in (SG);

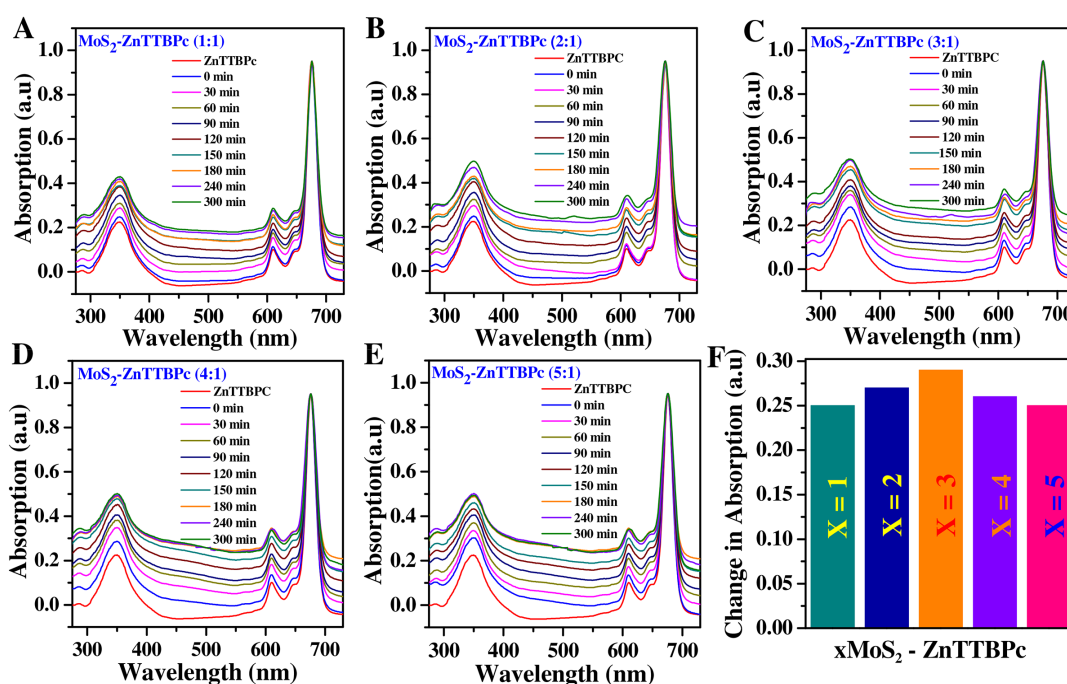

Figure S1 Optical absorption spectra of MoS<sub>2</sub>-ZnTTBPc composite with varying ratio of MoS<sub>2</sub> and ZnTTBPc (A) 1:1, (B) 2:1, (C) 3:1, (D) 4:1, (E) 5: 1. (F) A comparison of change in absorption after 300 min of sonication for the varying ratio of MoS<sub>2</sub> in the MoS<sub>2</sub>-ZnTTBPc composite.

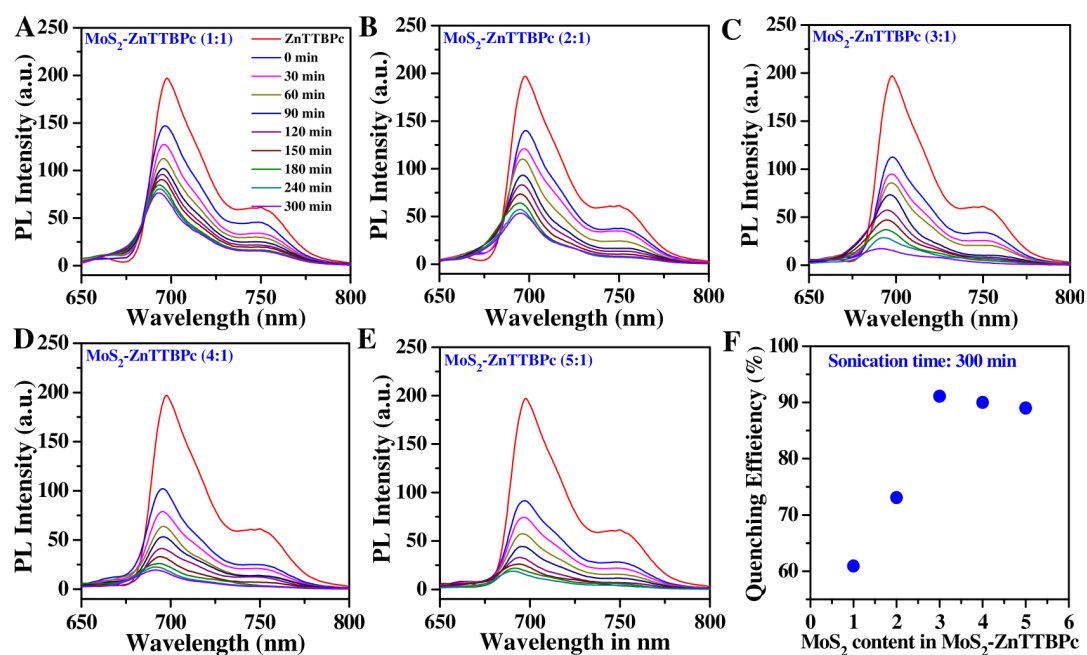

Figure S2 Photoluminescence spectra of controlled-ZnTTBPc, and  $\text{MoS}_2$ -ZnTTBPc composite with varying ratio of  $\text{MoS}_2$  and ZnTTBPc (A) 1:1, (B) 2:1, (C) 3:1, (D) 4:1, (E) 5: 1. (F) Variation of quenching efficiency of the  $\text{MoS}_2$ -ZnTTBPc composite for different  $\text{MoS}_2$  content in the composite after 300 min of sonication.

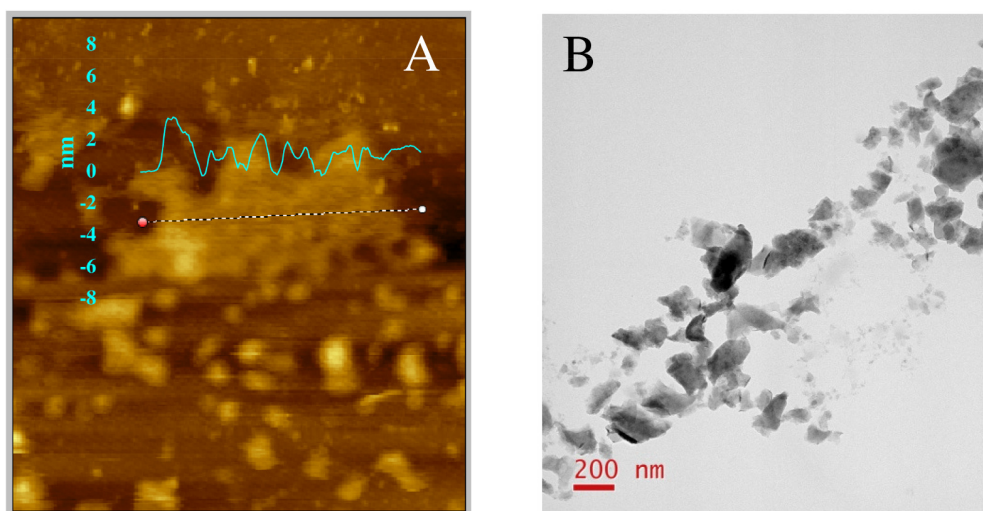

Figure S3 (A) AFM image of  $\text{MoS}_2$ -ZnTTBPc (3:1) composite films on a silicon wafer. (B) TEM image of  $\text{MoS}_2$ -ZnTTBPc (3:1) composite.

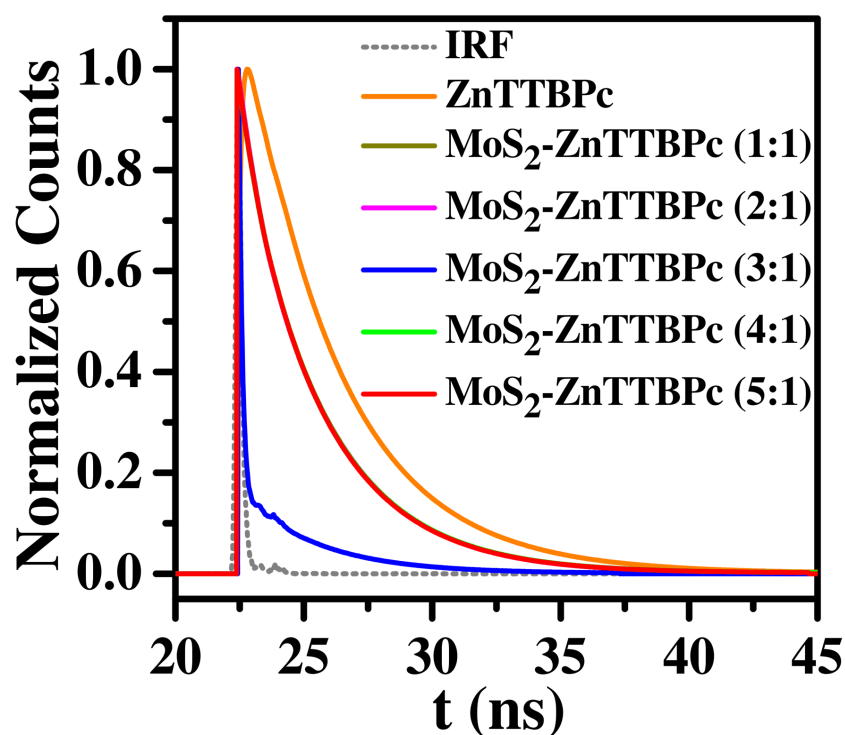

Figure S4 Lifetime transients of controlled-ZnTTBPc, MoS<sub>2</sub>-ZnTTBPc (1:1), MoS<sub>2</sub>-ZnTTBPc (2:1), MoS<sub>2</sub>-ZnTTBPc (3:1), MoS<sub>2</sub>-ZnTTBPc (4:1), MoS<sub>2</sub>-ZnTTBPc (5:1) composites along with the IRF.

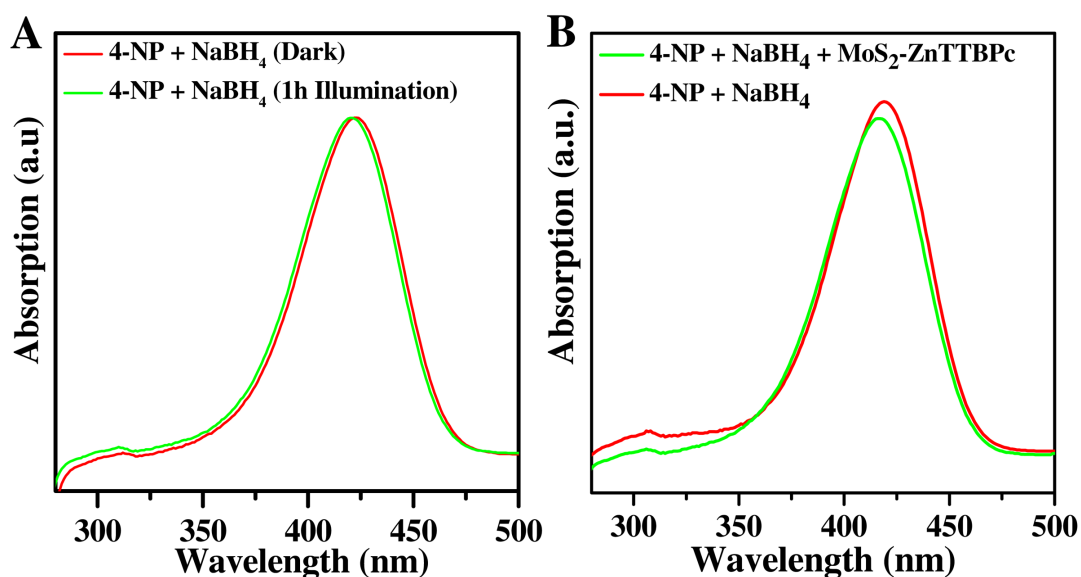

Figure S5 UV-vis absorption spectra of 4-NP and NaBH<sub>4</sub> solution (A) without catalyst under dark and simulated solar light illumination for 1 h (B) with and without MoS<sub>2</sub>-ZnTTBPc (3:1) composite under dark.

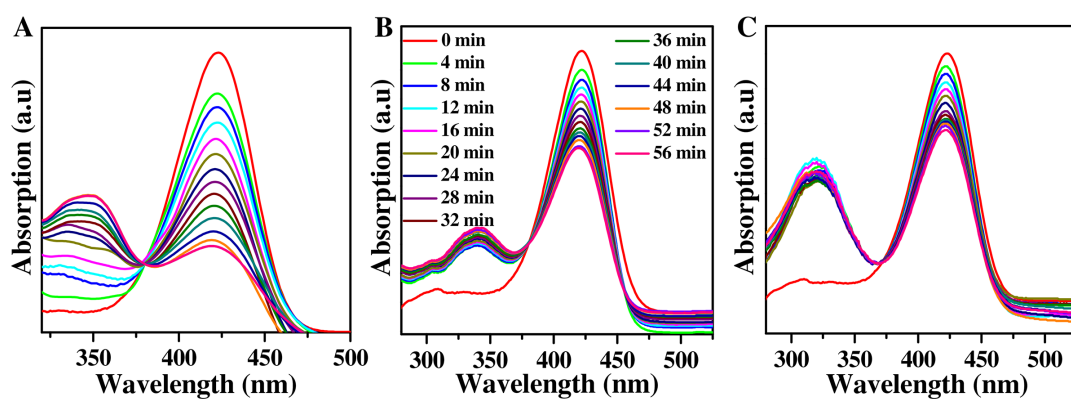

Figure S6 UV-vis absorption spectra of 4-NP and NaBH<sub>4</sub> solution with (A) MoS<sub>2</sub>-ZnTTBPc (3:1) composite, (B) controlled-ZnTTBPc, and (C) controlled-MoS<sub>2</sub> for different time of simulated solar light illumination.

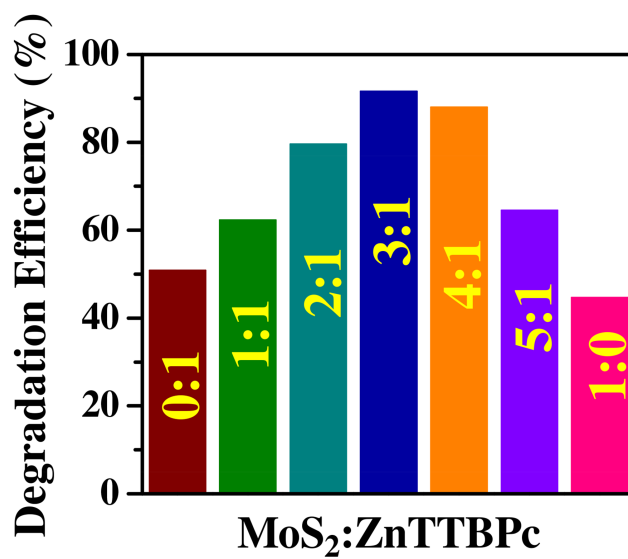

Figure S7 Comparison of the photo degradation efficiency with varying ratio of MoS<sub>2</sub> and ZnTTBPc in the MoS<sub>2</sub>-ZnTTBPc composite.

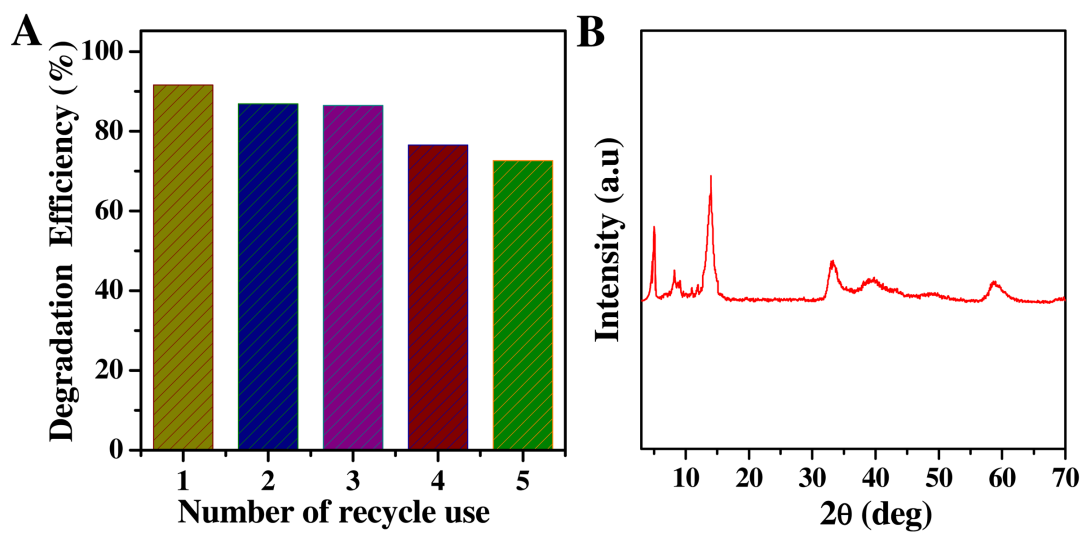

Figure S8 (A) Photodegradation efficiency of MoS<sub>2</sub>-ZnTTBPc (3:1) composite for different cycle. (B) The XRD pattern of MoS<sub>2</sub>-ZnTTBPc (3:1) composite after five cycles of reduction of 4-NP.
